# Supplementary material
Source: publisher site journal article supplement (https://www.dovepress.com/article/420130)
Supplement: Supplementary file 1 [file get_supplementary_file.php]

SUPPLEMENTARY MATERIAL

Supplementary table 1. Patient characteristics for all of the 4979 included patients. Known surveillance status in 4116 patients.

|  | Total cohort (n=4979) | Surveillance group(n=1078) | Non-surveillance, presumed indication (n=1647) | All non-surveillance patients(n=3038) |
| --- | --- | --- | --- | --- |
| Median age at diagnosis (range) | 69 (18-97) | 65 (22-90) | 68 (32-93) * | 71 (18-97)* |
| Gender |  |  | * |  |
| Male | 3750 (75.3%) | 819 (76.0%) | 1308 (79.4%) | 2311 (76.1%) |
| Female | 1229 (24.7%) | 259 (24.0%) | 339 (20.6%) | 727 (23.9%) |
| Liver cirrhosis |  |  | * | * |
| Yes | 3073 (61.7%) | 944 (87.6%) | 1640 (99.6%) | 1640 (54.0%) |
| No | 1490 (29.9%) | 116 (10.8%) | 6 (0.4%) | 1114 (36.7%) |
| Unknown | 416 (8.4%) | 18 (1.7%) | 1 (0.1%) | 284 (9.3%) |
| CTP classa |  |  | * | * |
| CTP A | 1310 (42.6%) | 536 (56.8%) | 569 (34.7%) | 569 (34.7%) |
| CTP B | 759 (24.7%) | 202 (21.4%) | 425 (25.9%) | 425 (25.9%) |
| CTP C | 236 (7.7%) | 42 (4.4%) | 157 (9.6%) | 157 (9.6%) |
| Unknown | 768 (25.0%) | 164 (17.4%) | 489 (29.8%) | 489 (29.8%) |
| ECOG |  |  | * | * |
| 0 | 1181 (23.7%) | 492 (45.6%) | 379 (23.0%) | 689 (22.7%) |
| 1 | 964 (19.4% | 282 (26.2%) | 374 (22.7%) | 681 (22.4%) |
| 2 | 681 (13.7%) | 99 (9.2%) | 308 (18.7%) | 582 (19.2%) |
| 3 | 361 (7.3%) | 29 (2.7%) | 175 (10.6%) | 332 (10.9%) |
| 4 | 66 (1.3%) | 5 (0.5%) | 32 (1.9%) | 60 (2.0%) |
| Unknown | 1726 (65.3%) | 171 (15.9%) | 379 (23.0%) | 2344 (22.8%) |
| Diabetes mellitusb |  |  | * | * |
| Yes | 1470 (29.5%) | 308 (28.6%) | 597 (36.2%)* | 1032 (34.0%)* |
| No | 2681 (53.8%) | 748 (69.4%) | 1018 (61.8%) | 1929 (63.5%) |
| Unknown | 828 (16.6%) | 22 (2.0%) | 32 (1.9%) | 77 (2.5%) |
| Ascites |  |  | * | * |
| None | 3391 (68.1%) | 829 (76.9%) | 936 (56.8%) | 1991 (65.5%) |
| Mild | 534 (10.7%) | 123 (11.4%) | 233 (14.1%) | 320 (10.5%) |
| Moderate-Severe | 502 (10.1%) | 59 (5.5%) | 294 (17.9%) | 353 (11.6%) |
| Unknown | 552 (11.1%) | 67 (6.2%) | 184 (11.2%) | 374 (12.3%) |
| Hepatic encephalopathy |  |  | * |  |
| None | 4098 (82.3%) | 976 (90.5%) | 1265 (76.8%) | 2418 (79.6%) |
| Grade I-II | 119 (2.4%) | 23 (2.1%) | 66 (4.0%) | 75 (2.5%) |
| Grade III-IV | 32 (0.6%) | 4 (0.4%) | 19 (1.2%) | 24 (0.8%) |
| Unknown | 730 (14.7%) | 75 (7.0%) | 297 (18%) | 521 (17.1%) |

Abbreviations: CTP, Child-Turcotte-Pugh; ECOG, Eastern Cooperative Oncology Group.
aPercentage for cirrhotic patients only.
bAny type.
*Significant difference compared to surveillance group.

Supplementary table 2. Underlying etiology of hepatocellular carcinoma. Presented as numbers and valid percentages. Known surveillance status in 4116 patients.

|  | Total cohort (n=4979) | Surveillance group(n=1078) | Non-surveillance, presumed indication (n=1647) | All non-surveillance patients(n=3038) |
| --- | --- | --- | --- | --- |
| Single etiology |  |  |  |  |
| HCV | 811 (29.5%) | 298 (32.1%) | 293 (25.2%)* | 376 (27.2%)* |
| ALD | 711 (25.8%) | 198 (21.3%) | 365 (31.3%)* | 412 (29.8%)* |
| NAFLD | 179 (6.5%) | 74 (8.0%) | 85 (7.3%) | 98 (7.1%) |
| HBV | 176 (6.4%) | 51 (5.5%) | 53 (4.5%) | 88 (6.4%) |
| PBC | 106 (3.9%) | 26 (2.8%) | 62 (5.3%)* | 63 (4.6%)* |
| Porphyria | 31 (1.1%) | 15 (1.6%) | 12 (1.0%) | 12 (0.9%) |
| Other single etiologya | 130 (4.7%) | 44 (4.7%) | 38 (3.3%) | 54 (3.9%) |
| Multiple etiologies |  |  |  |  |
| ALD+HCV | 419 (15.2%) | 158 (17.0%) | 177 (15.2%) | 188 (13.6%)* |
| ALD+Other etiology | 94 (3.4%) | 32 (3.4%) | 45 (3.9%) | 47 (3.4%) |
| HBV+HCV | 52 (1.9%) | 18 (1.9%) | 17 (1.5%) | 22 (1.6%) |
| Other combinations | 43 (1.6%) | 15 (1.6%) | 18 (1.5%) | 21 (1.5%) |
| Unkown etiology | 2227 (44.7%) | 149 (13.8%) | 482 (29.3%)* | 1657 (54.5%)* |

Abbreviations: HCV, hepatitis C virus; HBV, hepatitis B virus; ALD, alcoholic liver disease; NAFLD, non-alcoholic fatty liver disease; PBC, primary biliary cholangitis.
aEach comprising < 2%. Including autoimmune hepatitis, hemochromatosis, primary sclerosing cholangitis, alpha-1-antitrypsine deficiency, Budd-Chiari syndrome, Fanconi anemia, Alagille syndrome, echinococcosis, glycogen storage disease type 4, congenital portosystemic venous shunt and Wilson's disease.
*Significant difference compared to surveillance group.
